# Supplementary material for: MicroRNA-mediated network redundancy is constrained by purifying selection and contributes to expression robustness
Source: Research Square preprint supplement (doi:10.21203/rs.3.rs-3884558/v1), 2024-02-08
Supplement: Supplementary file 1 [file d4cbdb7aafa50b0ac7909718.xlsx]

## Sheet: PublicChIPseq
GSE49769	E8-16h	Eip74EF	FBgn0000567	E8-16h	ChIP-seq
GSM847577	E0-12h	ash2	FBgn0000139	E0-12h	ChIP-seq
modENCODE_606	E0-12h	Dll	FBgn0000157	E0-12h	ChIP-chip
GSM511083	E0-1h	BCD	FBgn0000166	E0-1h	ChIP-seq
GSM853471	E8-16h	bcd	FBgn0000166	E8-16h	ChIP-seq
GSM511087	E0-1h	CAD	FBgn0000251	E0-1h	ChIP-seq
GSM621329	E0-4h	cad	FBgn0000251	E0-4h	ChIP-chip
GSM621340	E0-4h	cad	FBgn0000251	E0-4h	ChIP-chip
ModENCODE_2570	E0-4h	CAD	FBgn0000251	E0-4h	ChIP-chip
ModENCODE_2578	E4-8h	CAD	FBgn0000251	E4-8h	ChIP-chip
modENCODE_2626	E0-4h	CAD	FBgn0000251	E0-4h	ChIP-seq
ModENCODE_2626	E0-4h	Caudal	FBgn0000251	E0-4h	ChIP-seq
modENCODE_2637	E4-8h	CAD	FBgn0000251	E4-8h	ChIP-seq
ModENCODE_902	E0-4h	CAD	FBgn0000251	E0-4h	ChIP-chip
GSM621330	E0-8h	D	FBgn0000411	E0-8h	ChIP-chip
GSM628262	E0-8h	D	FBgn0000411	E0-8h	ChIP-seq
modENCODE_2571	E0-8h	D	FBgn0000411	E0-8h	ChIP-chip
modENCODE_3395	E0-8h	Dichaete	FBgn0000411	E0-8h	ChIP-seq
modENCODE_626	E0-12h	D	FBgn0000411	E0-12h	ChIP-chip
GSM569798	E16-24h	dfd	FBgn0000439	E16-24h	ChIP-seq
GSM594216	E0-8h	Dfd	FBgn0000439	E0-8h	ChIP-seq
GSM851848	E0-8h	Dfd	FBgn0000439	E0-8h	ChIP-seq
modENCODE_3229	E16-24h	dfd	FBgn0000439	E16-24h	ChIP-seq
modENCODE_3236	E0-8h	dfd	FBgn0000439	E0-8h	ChIP-seq
ModENCODE_5023	E0-8h	Hr46	FBgn0000448	E0-8h	ChIP-seq
GSM570038	E0-8h	disco	FBgn0000459	E0-8h	ChIP-seq
GSM571140	E8-16h	disco	FBgn0000459	E8-16h	ChIP-seq
GSM621331	E0-8h	disco	FBgn0000459	E0-8h	ChIP-chip
ModENCODE_2572	E0-8h	Disco	FBgn0000459	E0-8h	ChIP-chip
ModENCODE_2572	E0-8h	disco	FBgn0000459	E0-8h	ChIP-chip
modENCODE_3235	E0-8h	Disco	FBgn0000459	E0-8h	ChIP-seq
ModENCODE_4976	E8-16h	Eip74EF	FBgn0000567	E8-16h	ChIP-seq
modENCODE_3184	E0-12h	EN	FBgn0000577	E0-12h	ChIP-chip
modENCODE_611	E7-24	EN	FBgn0000577	E7-24	ChIP-chip
modENCODE_625	E0-12h	EN	FBgn0000577	E0-12h	ChIP-chip
GSM594222	E1-6h	eve	FBgn0000606	E1-6h	ChIP-seq
GSM594245	E8-16h	eve	FBgn0000606	E8-16h	ChIP-seq
ModENCODE_2603	E1-6h	EVE	FBgn0000606	E1-6h	ChIP-chip
modENCODE_3239	E1-6h	eve	FBgn0000606	E1-6h	ChIP-seq
modENCODE_3400	E1-6h	eve	FBgn0000606	E1-6h	ChIP-seq
modENCODE_3401	E8-16h	eve	FBgn0000606	E8-16h	ChIP-seq
GSM669541	E16-24h	exd	FBgn0000611	E16-24h	ChIP-seq
modENCODE_3183	E0-8h	exd	FBgn0000611	E0-8h	ChIP-chip
ModENCODE_3183	E0-8h	exd	FBgn0000611	E0-8h	ChIP-chip
ModENCODE_3241	E8-16h	exd	FBgn0000611	E8-16h	ChIP-seq
modENCODE_2585	E8-16h	EZ	FBgn0000629	E8-16h	ChIP-chip
modENCODE_624	E0-12h	FTZ	FBgn0001077	E0-12h	ChIP-chip
modENCODE_597	E0-12h	GRO	FBgn0001139	E0-12h	ChIP-chip
modENCODE_623	E0-12h	GRO	FBgn0001139	E0-12h	ChIP-chip
modENCODE_610	E7-24h	GSB-N	FBgn0001147	E7-24h	ChIP-chip
GSE49771	E0-8h	h	FBgn0001168	E0-8h	ChIP-seq
GSM621333	E0-8h	h	FBgn0001168	E0-8h	ChIP-chip
GSM669472	E8-16h	h	FBgn0001168	E8-16h	ChIP-seq
ModENCODE_3402	E8-16h	hairy	FBgn0001168	E8-16h	ChIP-seq
ModENCODE_4982	E0-8h	hairy	FBgn0001168	E0-8h	ChIP-seq
modENCODE_2574	E0-8h	H	FBgn0001169	E0-8h	ChIP-chip
GSM511081	E0-1h	HB	FBgn0001180	E0-1h	ChIP-seq
GSM511082	E0-1h	HB	FBgn0001180	E0-1h	ChIP-seq
GSE50338	E0-8h	hth	FBgn0001235	E0-8h	ChIP-seq
GSM847704	E8-16h	hth	FBgn0001235	E8-16h	ChIP-seq
GSM851743	E0-8h	hth	FBgn0001235	E0-8h	ChIP-seq
ModENCODE_4070	E0-8h	hth	FBgn0001235	E0-8h	ChIP-seq
modENCODE_605	E0-12h	INV	FBgn0001269	E0-12h	ChIP-chip
modENCODE_619	E0-12h	INV	FBgn0001269	E0-12h	ChIP-chip
modENCODE_618	E0-12h	KN	FBgn0001319	E0-12h	ChIP-chip
ModENCODE_618	E0-12h	KNOT	FBgn0001319	E0-12h	ChIP-chip
GSM511088	E0-1h	KNI	FBgn0001320	E0-1h	ChIP-seq
GSM570045	E8-16h	kni	FBgn0001320	E8-16h	ChIP-seq
modENCODE_3243	E8-16h	KNI	FBgn0001320	E8-16h	ChIP-seq
GSM511084	E0-1h	KR	FBgn0001325	E0-1h	ChIP-seq
GSM511085	E0-1h	KR	FBgn0001325	E0-1h	ChIP-seq
GSM621326	E0-8h	Kr	FBgn0001325	E0-8h	ChIP-chip
GSM636835	E16-24h	Kr	FBgn0001325	E16-24h	ChIP-seq
modENCODE_3394	E16-24h	Kruppel	FBgn0001325	E16-24h	ChIP-seq
modENCODE_898	E0-8h	KR	FBgn0001325	E0-8h	ChIP-chip
GSM621336	E4-8h	sens	FBgn0002573	E4-8h	ChIP-chip
GSM621342	E4-8h	sens	FBgn0002573	E4-8h	ChIP-chip
GSM621343	E4-8h	sens	FBgn0002573	E4-8h	ChIP-chip
modENCODE_2577	E4-8h	SENS	FBgn0002573	E4-8h	ChIP-chip
modENCODE_978	E4-8h	SENS	FBgn0002573	E4-8h	ChIP-chip
modENCODE_979	E4-8h	SENS	FBgn0002573	E4-8h	ChIP-chip
ModENCODE_24	E0-12h	mod(mdg4)	FBgn0002781	E0-12h	ChIP-chip
GSM569800	E0-8h	Pcl	FBgn0003044	E0-8h	ChIP-seq
modENCODE_3237	E0-8h	PCL	FBgn0003044	E0-8h	ChIP-seq
GSE50349	E0-12h	prd	FBgn0003145	E0-12h	ChIP-seq
GSE50350	E0-12h	prd	FBgn0003145	E0-12h	ChIP-seq
GSM847619	E0-12h	prd	FBgn0003145	E0-12h	ChIP-seq
ModENCODE_4095	E0-12h	prd	FBgn0003145	E0-12h	ChIP-seq
ModENCODE_4096	E0-12h	prd	FBgn0003145	E0-12h	ChIP-seq
modENCODE_617	E0-12h	RUN	FBgn0003300	E0-12h	ChIP-chip
GSM847698	E16-24h	sr	FBgn0003499	E16-24h	ChIP-seq
GSM847752	E8-16h	sr	FBgn0003499	E8-16h	ChIP-seq
GSM621339	E0-12h	su(Hw)	FBgn0003567	E0-12h	ChIP-chip
GSM851841	E16-24h	su(Hw)	FBgn0003567	E16-24h	ChIP-seq
ModENCODE_27	E0-12h	su(Hw)	FBgn0003567	E0-12h	ChIP-chip
modENCODE_901	E0-12h	su(Hw)	FBgn0003567	E0-12h	ChIP-chip
GSE49777	E0-8h	Tbp	FBgn0003687	E0-8h	ChIP-seq
GSM594213	E0-4h	tll	FBgn0003720	E0-4h	ChIP-seq
modENCODE_3186	E0-4h	tll	FBgn0003720	E0-4h	ChIP-chip
modENCODE_3234	E0-4h	tll	FBgn0003720	E0-4h	ChIP-seq
GSM853470	E16-24h	ttk	FBgn0003870	E16-24h	ChIP-seq
modENCODE_603	E3-8h	UBX	FBgn0003870	E3-8h	ChIP-chip
modENCODE_612	E3-8h	UBX	FBgn0003870	E3-8h	ChIP-chip
modENCODE_613	E3-8h	UBX	FBgn0003870	E3-8h	ChIP-chip
modENCODE_614	E0-12h	UBX	FBgn0003870	E0-12h	ChIP-chip
modENCODE_615	E0-12h	TTK	FBgn0003870	E0-12h	ChIP-chip
GSM853486	E0-12h	Ubx	FBgn0003944	E0-12h	ChIP-seq
GSE50360	E0-12h	usp	FBgn0003964	E0-12h	ChIP-seq
GSM851706	E0-12h	usp	FBgn0003964	E0-12h	ChIP-seq
modENCODE_4114	E0-12h	usp	FBgn0003964	E0-12h	ChIP-seq
GSE50339	E0-8h	sc	FBgn0004170	E0-8h	ChIP-seq
GSE50352	E0-12h	sc	FBgn0004170	E0-12h	ChIP-seq
GSM847656	E0-12h	sc	FBgn0004170	E0-12h	ChIP-seq
GSM853490	E0-8h	sc	FBgn0004170	E0-8h	ChIP-seq
ModENCODE_4071	E0-8h	scute	FBgn0004170	E0-8h	ChIP-seq
ModENCODE_4099	E0-12h	scute	FBgn0004170	E0-12h	ChIP-seq
modENCODE_604	E0-12h	ZFH1	FBgn0004606	E0-12h	ChIP-chip
GSE50347	E0-8h	fru	FBgn0004652	E0-8h	ChIP-seq
GSM847696	E16-24h	fru	FBgn0004652	E16-24h	ChIP-seq
GSM853488	E0-8h	fru	FBgn0004652	E0-8h	ChIP-seq
ModENCODE_4089	E0-8h	fru	FBgn0004652	E0-8h	ChIP-seq
GSM853491	E0-8h	sim	FBgn0004666	E0-8h	ChIP-seq
GSE49776	E0-8h	Su(H)	FBgn0004837	E0-8h	ChIP-seq
GSE50337	E8-16h	Su(H)	FBgn0004837	E8-16h	ChIP-seq
GSM847700	E16-24h	Su(H)	FBgn0004837	E16-24h	ChIP-seq
GSM847767	E8-16h	Su(H)	FBgn0004837	E8-16h	ChIP-seq
ModENCODE_4069	E16-24h	su(H)	FBgn0004837	E16-24h	ChIP-seq
ModENCODE_5017	E0-8h	Su(H)	FBgn0004837	E0-8h	ChIP-seq
modENCODE_628	E0-12h	BAB1	FBgn0004870	E0-12h	ChIP-chip
GSM851839	E16-24h	Hnf4	FBgn0004914	E16-24h	ChIP-seq
GSM570043	E16-24h	Trl	FBgn0013263	E16-24h	ChIP-seq
GSM614652	E0-8h	Trl	FBgn0013263	E0-8h	ChIP-seq
GSM628226	E8-16h	Trl	FBgn0013263	E8-16h	ChIP-seq
modENCODE_23	E0-12h	TRL	FBgn0013263	E0-12h	ChIP-chip
modENCODE_3238	E16-24h	GAF	FBgn0013263	E16-24h	ChIP-seq
GSE50370	E0-8h	Hr78	FBgn0015239	E0-8h	ChIP-seq
ModENCODE_4998	E8-16h	Hr78	FBgn0015239	E8-16h	ChIP-seq
GSM621335	E0-8h	jumu	FBgn0015396	E0-8h	ChIP-chip
modENCODE_2576	E0-8h	JUMU	FBgn0015396	E0-8h	ChIP-chip
GSE49775	E12-24h	Stat92E	FBgn0016917	E12-24h	ChIP-seq
ModENCODE_5014	E12-24h	STAT92E	FBgn0016917	E12-24h	ChIP-seq
modENCODE_616	E0-12h	STAT92E	FBgn0016917	E0-12h	ChIP-chip
modENCODE_607	E0-12h	CTBP	FBgn0020496	E0-12h	ChIP-chip
GSM569791	E0-12h	Sin3A	FBgn0022764	E0-12h	ChIP-seq
modENCODE_3232	E0-12h	Sin3A	FBgn0022764	E0-12h	ChIP-seq
modENCODE_3393	E16-24h	bonus	FBgn0023097	E16-24h	ChIP-seq
GSM570049	E0-4h	CBP	FBgn0026144	E0-4h	ChIP-seq
GSM621338	E0-4h	CBP	FBgn0026144	E0-4h	ChIP-chip
modENCODE_854	E0-4h	CBP	FBgn0026144	E0-4h	ChIP-seq
ModENCODE_900	E0-4h	CBP	FBgn0026144	E0-4h	ChIP-chip
GSM847706	E8-16h	jim	FBgn0027339	E8-16h	ChIP-seq
GSE53556	E8-16h	HP1b	FBgn0030082	E8-16h	ChIP-seq
GSM628251	E16-24h	HP1b	FBgn0030082	E16-24h	ChIP-seq
GSM628252	E16-24h	HP1b	FBgn0030082	E16-24h	ChIP-seq
GSM847702	E8-16h	HP1b	FBgn0030082	E8-16h	ChIP-seq
ModENCODE_3187	E16-24h	HP1b	FBgn0030082	E16-24h	ChIP-chip
ModENCODE_3188	E16-24h	HP1b	FBgn0030082	E16-24h	ChIP-chip
modENCODE_3391	E16-24h	HP1b	FBgn0030082	E16-24h	ChIP-seq
modENCODE_3392	E16-24h	HP1b	FBgn0030082	E16-24h	ChIP-seq
GSM669539	E0-4h	Yki	FBgn0034970	E0-4h	ChIP-seq
modENCODE_5029	E8-16h	Yki	FBgn0034970	E8-16h	ChIP-seq
GSM853468	E16-24h	CTCF	FBgn0035769	E16-24h	ChIP-seq
ModENCODE_769	E0-12h	CTCF	FBgn0035769	E0-12h	ChIP-chip
ModENCODE_770	E0-12h	CTCF	FBgn0035769	E0-12h	ChIP-chip
GSM594225	E8-16h	CG8478	FBgn0037746	E8-16h	ChIP-seq
GSM614655	E16-24h	CG8478	FBgn0037746	E16-24h	ChIP-seq
modENCODE_3240	E8-16h	CG8478	FBgn0037746	E8-16h	ChIP-seq
GSM669477	E16-24h	Fer3	FBgn0037937	E16-24h	ChIP-seq
GSM621332	E0-8h	GATAE	FBgn0038391	E0-8h	ChIP-chip
ModENCODE_2573	E0-8h	GATAe	FBgn0038391	E0-8h	ChIP-chip
modENCODE_2573	E0-8h	GATAE	FBgn0038391	E0-8h	ChIP-chip
GSM669537	E16-24h	cbt	FBgn0043364	E16-24h	ChIP-seq
GSE50340	E0-8h	pan	FBgn0085432	E0-8h	ChIP-seq
GSE50357	E16-24h	pan	FBgn0085432	E16-24h	ChIP-seq
GSM851817	E0-8h	pan	FBgn0085432	E0-8h	ChIP-seq
ModENCODE_4074	E0-8h	pangolin	FBgn0085432	E0-8h	ChIP-seq
ModENCODE_4107	E16-24h	pangolin	FBgn0085432	E16-24h	ChIP-seq
modENCODE_608	E0-12h	CHINMO	FBgn0086758	E0-12h	ChIP-chip
GSM628224	E16-24h	Hr39	FBgn0261239	E16-24h	ChIP-chip
modENCODE_3390	E16-24h	Hr39	FBgn0261239	E16-24h	ChIP-seq
GSM569793	E8-16h	hkb	FBgn0261434	E8-16h	ChIP-seq
GSM621334	E0-8h	hkb	FBgn0261434	E0-8h	ChIP-chip
modENCODE_2575	E0-8h	HKB	FBgn0261434	E0-8h	ChIP-chip
modENCODE_3242	E8-16h	Huckebein	FBgn0261434	E8-16h	ChIP-seq
modENCODE_3233	E0-4h	nejire	FBgn0261617	E0-4h	ChIP-seq
ModENCODE_643	E20-24h	nejire	FBgn0261617	E20-24h	ChIP-chip
modENCODE_855	E4-8h	nejire	FBgn0261617	E4-8h	ChIP-seq
modENCODE_856	E12-16h	nejire	FBgn0261617	E12-16h	ChIP-seq
modENCODE_857	E16-20h	nejire	FBgn0261617	E16-20h	ChIP-seq
modENCODE_858	E20-24h	nejire	FBgn0261617	E20-24h	ChIP-seq
ModENCODE_875	E0-4h	nejire	FBgn0261617	E0-4h	ChIP-chip
ModENCODE_876	E4-8h	nejire	FBgn0261617	E4-8h	ChIP-chip
ModENCODE_877	E16-20h	nejire	FBgn0261617	E16-20h	ChIP-chip
ModENCODE_900	E0-4h	nejire	FBgn0261617	E0-4h	ChIP-chip
modENCODE_985	E8-12h	nejire	FBgn0261617	E8-12h	ChIP-seq
GSE50345	E16-24h	cnc	FBgn0262975	E16-24h	ChIP-seq
GSM847675	E16-24h	cnc	FBgn0262975	E16-24h	ChIP-seq
ModENCODE_4081	E16-24h	cnc	FBgn0262975	E16-24h	ChIP-seq
modENCODE_627	E0-12h	CNC	FBgn0262975	E0-12h	ChIP-chip
GSE50365	E0-8h	Lpt	FBgn0263667	E0-8h	ChIP-seq
modENCODE_3396	E0-12h	Su(var)3-9	FBgn0263755	E0-12h	ChIP-seq
GSE49778	E0-8h	tgo	FBgn0264075	E0-8h	ChIP-seq
GSM669545	E0-12h	Hr4	FBgn0264562	E0-12h	ChIP-seq
GSE50343	E0-8h	lov	FBgn0266129	E0-8h	ChIP-seq
GSM847673	E16-24h	lov	FBgn0266129	E16-24h	ChIP-seq
GSM851729	E0-8h	lov	FBgn0266129	E0-8h	ChIP-seq
ModENCODE_4078	E8-16h	CG16778	FBgn0266129	E8-16h	ChIP-seq
GSE50342	E0-8h	br	FBgn0283451	E0-8h	ChIP-seq
GSM847657	E0-8h	br	FBgn0283451	E0-8h	ChIP-seq
GSM621130	E16-24h	nw	FBgn0283508	E16-24h	ChIP-seq
GSM628255	E8-16h	nw	FBgn0283508	E8-16h	ChIP-seq
GSM636830	E8-16h	nw	FBgn0283508	E8-16h	ChIP-seq
GSE49772	E0-12h	lola	FBgn0283521	E0-12h	ChIP-seq
GSE49773	E12-24h	lola	FBgn0283521	E12-24h	ChIP-seq
ModENCODE_5004	E0-12h	lola	FBgn0283521	E0-12h	ChIP-seq
ModENCODE_5005	E12-24h	lola	FBgn0283521	E12-24h	ChIP-seq
GSM621328	E0-4h	bks	FBgn0285917	E0-4h	ChIP-chip
modENCODE_2569	E0-4h	BKS	FBgn0285917	E0-4h	ChIP-chip
ModENCODE_609	E0-12h	BKS	FBgn0285917	E0-12h	ChIP-chip
modENCODE_609	E0-12h	Brakeless	FBgn0285917	E0-12h	ChIP-chip
