# Supplementary material for: MicroRNA-mediated network redundancy is constrained by purifying selection and contributes to expression robustness
Source: Research Square preprint supplement (doi:10.21203/rs.3.rs-3884558/v1), 2024-02-08
Supplement: Supplementary file 2 [file d5994fecefd82260e5b82c9c.xlsx]

## Sheet: No.ofTargetsPerTF
TFs	GeneName	No.TargetsByChIP	ConfirmedByATACPeaks	Percent		Ranges	Counts
FBgn0000139	absent, small, or homeotic discs 2(ash2)	69	66	0.956522		0~0.5	3
FBgn0000157	Distal-less(Dll)	73	72	0.986301		0.5~0.6	0
FBgn0000166	bicoid(bcd)	1631	1497	0.917842		0.6~0.7	7
FBgn0000251	caudal(cad)	3249	3244	0.998461		0.7~0.8	3
FBgn0000411	Dichaete(D)	271	271	1		0.8~0.9	16
FBgn0000439	Deformed(Dfd)	379	353	0.931398		0.9~1	40
FBgn0000448	Hormone receptor 3(Hr3)	636	240	0.377358
FBgn0000459	disconnected(disco)	717	577	0.804742
FBgn0000567	Ecdysone-induced protein 74EF(Eip74EF)	1426	1256	0.880785
FBgn0000577	engrailed(en)	2490	2285	0.917671
FBgn0000606	even skipped(eve)	719	667	0.927677
FBgn0000611	extradenticle(exd)	3284	2294	0.698538
FBgn0001077	fushi tarazu(ftz)	23	11	0.478261
FBgn0001139	groucho(gro)	428	426	0.995327
FBgn0001147	gooseberry-neuro(gsb-n)	438	435	0.993151
FBgn0001168	hairy(h)	5395	4413	0.81798
FBgn0001180	hunchback(hb)	3478	3420	0.983324
FBgn0001235	homothorax(hth)	2015	1834	0.910174
FBgn0001269	invected(inv)	529	370	0.699433
FBgn0001319	knot(kn)	494	419	0.848178
FBgn0001320	knirps(kni)	513	512	0.998051
FBgn0001325	Kruppel(Kr)	3712	3583	0.965248
FBgn0002781	modifier of mdg4(mod(mdg4))	3221	3161	0.981372
FBgn0003044	Polycomblike(Pcl)	564	399	0.707447
FBgn0003145	paired(prd)	1917	1615	0.842462
FBgn0003300	runt(run)	158	151	0.955696
FBgn0003499	stripe(sr)	475	475	1
FBgn0003567	suppressor of Hairy wing(su(Hw))	2098	1851	0.882269
FBgn0003687	TATA binding protein(Tbp)	5633	5514	0.978874
FBgn0003720	tailless(tll)	409	276	0.674817
FBgn0003870	tramtrack(ttk)	1963	1859	0.94702
FBgn0003944	Ultrabithorax(Ubx)	344	333	0.968023
FBgn0003964	ultraspiracle(usp)	895	758	0.846927
FBgn0004170	scute(sc)	2501	2212	0.884446
FBgn0004606	Zn finger homeodomain 1(zfh1)	402	358	0.890547
FBgn0004652	fruitless(fru)	4507	4001	0.88773
FBgn0004666	single-minded(sim)	373	345	0.924933
FBgn0004837	Suppressor of Hairless(Su(H))	4782	4401	0.920326
FBgn0004870	bric a brac 1(bab1)	321	310	0.965732
FBgn0004914	Hepatocyte nuclear factor 4(Hnf4)	379	290	0.765172
FBgn0013263	Trithorax-like(Trl)	3403	3356	0.986189
FBgn0015239	Hormone-receptor-like in 78(Hr78)	1082	995	0.919593
FBgn0016917	Signal-transducer and activator of transcription protein at 92E(Stat92E)	936	792	0.846154
FBgn0020496	C-terminal Binding Protein(CtBP)	896	614	0.685268
FBgn0022764	Sin3A(Sin3A)	287	285	0.993031
FBgn0023097	bonus(bon)	131	118	0.900763
FBgn0026144	sarcoplasmic calcium-binding protein(CBP)	1214	1192	0.981878
FBgn0027339	jim(jim)	55	47	0.854545
FBgn0030082	Heterochromatin Protein 1b(HP1b)	4148	3249	0.783269
FBgn0034970	yorkie(yki)	3915	3180	0.812261
FBgn0035769	CTCF(CTCF)	4049	3957	0.977278
FBgn0037746	uncharacterized protein(CG8478)	615	512	0.83252
FBgn0037937	48 related 3(Fer3)	617	614	0.995138
FBgn0043364	cabut(cbt)	328	285	0.868902
FBgn0085432	pangolin(pan)	2776	2569	0.925432
FBgn0086758	Chronologically inappropriate morphogenesis(chinmo)	5618	3865	0.687967
FBgn0261239	Hormone receptor-like in 39(Hr39)	167	114	0.682635
FBgn0261434	huckebein(hkb)	229	144	0.628821
FBgn0261617	nejire(nej)	1086	1048	0.965009
FBgn0262975	cap-n-collar(cnc)	3334	3177	0.952909
FBgn0263667	Lost PHDs of trr(Lpt)	1736	1700	0.979263
FBgn0263755	Suppressor of variegation 3-9(Su(var)3-9)	589	585	0.993209
FBgn0264075	tango(tgo)	636	240	0.377358
FBgn0264562	Hormone receptor 4(Hr4)	316	304	0.962025
FBgn0266129	jim lovell(lov)	3865	3692	0.955239
FBgn0283451	broad(br)	5382	5164	0.959495
FBgn0283508	narrow(nw)	688	669	0.972384
FBgn0283521	longitudinals lacking(lola)	2254	1976	0.876664
FBgn0285917	scribbler(sbb)	2	2	1
